# Supplementary material for: Sex differences in type and occurrence of adverse reactions to opioid analgesics: a retrospective cohort study
Source: HighWire-hosted journal article supplement (doi:10.1136/bmjopen-2020-044157), 2021-06-01
Supplement: bmjopen-2020-044157supp002_data_supplement.pdf [file bmjopen-2020-044157supp002_data_supplement.pdf]

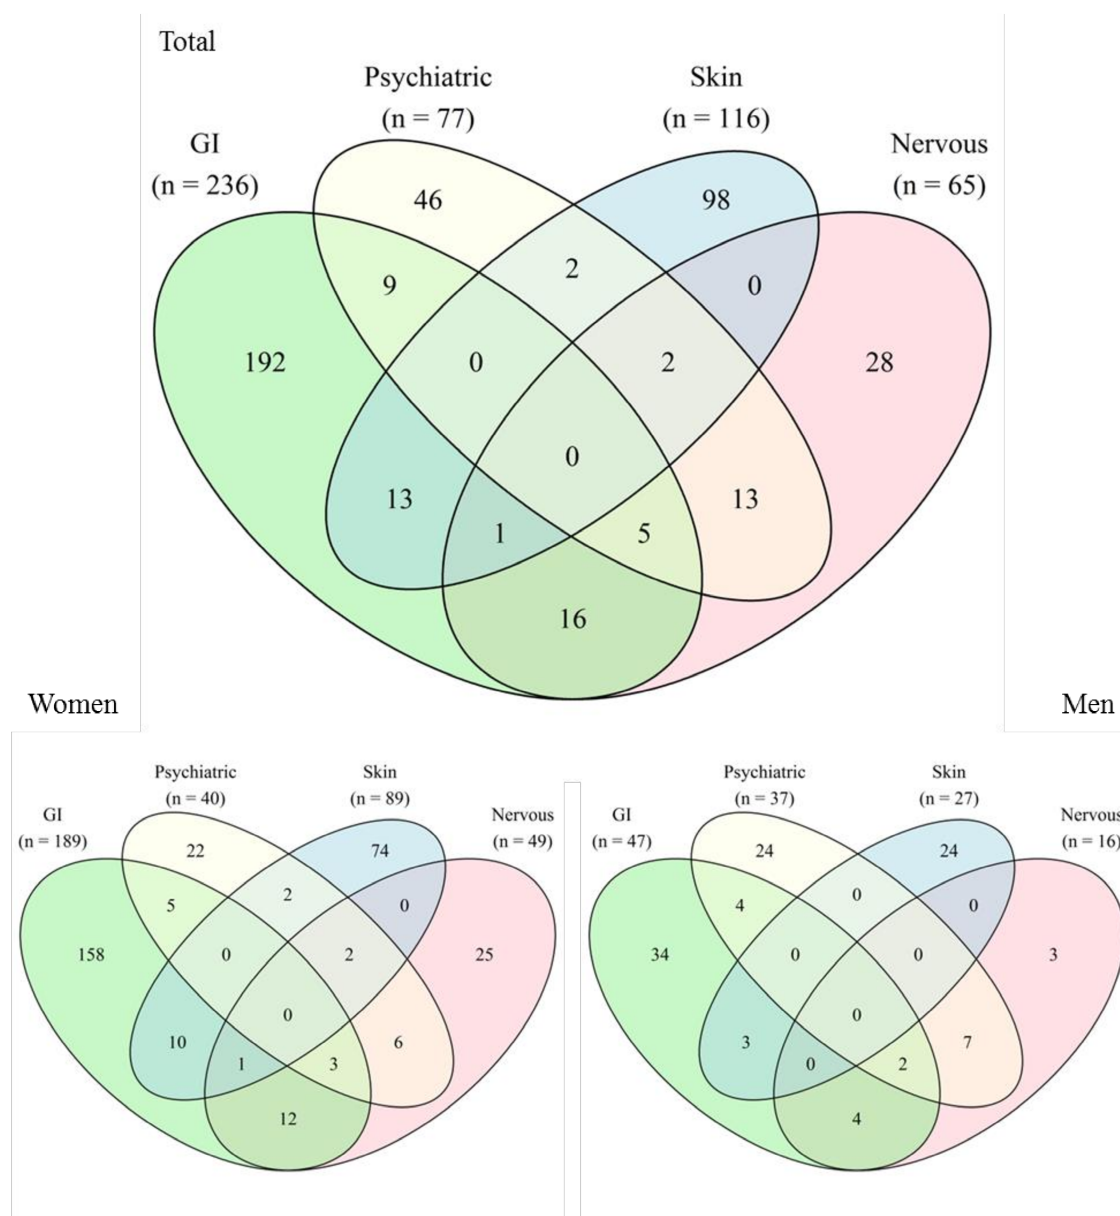

**Notes:** GI = Gastrointestinal. From 449 patients with at least one MedDRA class, 24 did not experience any of the four most common MedDRA classes.
